# Supplementary material
Source: publisher figshare collection journal article supplement (https://gsajournals.figshare.com/ndownloader/files/17710079)
Supplement: Supplementary file 1 [file 17710079]

## Sheet: ionbeam-pindel&menta
Table S5. SVs detected in all mutant lines.
SV ID	CHROM	POS_start	POS_end	Length(bp)	Mutant ID	Mutation type	Zygosity	Detected software	Validation
									IGV	Agarose gel electrophoresis	Sanger sequencing
G351-SV1	chr12	134536	134537	472	HTM_G351	Large insertion	Homozygous	Manta	○	○	○
G351-SV2	chr06	3936320	3936321	122	HTM_G351	Large insertion	Homozygous	Manta	○	○	○
G347-SV1	chr01	6813111	C[chr03:86480[	-	HTM_G347	Reciprocal translocation	Homozygous	Manta, BreakDancer	○	○	NA
G347-SV1	chr03	86480	]chr01:6813111]T	-	HTM_G347	Reciprocal translocation	Homozygous	Manta, BreakDancer	○	○	○
G347-SV2	chr01	38209311	38209312	360	HTM_G347	Large insertion	Homozygous	Manta	○	○	○
I223_SV1	chr03	25896271	26054405	158134	HTM_I223	INV	Homozygous	Manta,Pindel,BreakDancer	○	○	○
I223_SV1	chr03	25896272	25949019	52747	HTM_I223	Large deletion	Homozygous	Manta,Pindel,BreakDancer	○	○	NA
I223_SV2	chr04	12087757	12120140	32383	HTM_I223	INV	Homozygous	Manta,Pindel,BreakDancer	○	○	○
I223_SV3	chr07	4896444	]chr11:13741249]T	-	HTM_I223	Reciprocal translocation	Homozygous	Manta,Pindel,BreakDancer	○	×	NA
I223_SV3	chr11	13741249	C[chr07:4896444[	-	HTM_I223	Reciprocal translocation	Homozygous	Manta,Pindel,BreakDancer	○	○	○
I223_SV4	chr06	7703298	7740032	36734	HTM_I223	Large deletion	Homozygous	Manta	○	○	○
I223_SV5	chr12	20380098	20380099	449	HTM_I223	Large insertion	Homozygous	Manta	○	○	NA
I218_SV1	chr01	430147	599755	169608	HTM_I218	Large deletion	Homozygous	Manta,Pindel,BreakDancer	○	○	○
I218_SV2	chr11	5972993	6366499	393506	HTM_I218	DUP	Homozygous	Manta,Pindel	○	○	○
I218_SV2	chr11	6173182	6379762	206580	HTM_I218	INV	Homozygous	Manta,Pindel,BreakDancer	○	○	○
I218_SV2	chr11	5972967	6173187	200220	HTM_I218	Large deletion	Homozygous	Manta,Pindel	○	○	○
I218_SV3	chr12	24965269	24965756	487	HTM_I218	Large deletion	Homozygous	Manta	○	○	NA
I154_SV1	chr07	26164638	26291052	126414	HTM_I154	Large deletion	Homozygous	Manta,Pindel,BreakDancer	○	○	○
I154_SV2	chr06	11063172	11478215	415043	HTM_I154	INV	Homozygous	Manta	○	○	○
I227_SV1	chr07	22719674	22740609	20935	HTM_I227	INV	Homozygous	Pindel	○	○	○
I226_SV1	chr09	9644540	17011356	7366816	HTM_I226	INV	Homozygous	Manta	○	○	NA
I224_SV1	chr09	6060023	6060983	960	HTM_I224	Large deletion	Homozygous	Manta	○	○	○
I224_SV2	chr11	5907066	6026572	119506	HTM_I224	Large deletion	Homozygous	Manta, BreakDancer	○	○	NA
NA: Sequences were not clearly determined.
